# Supplementary material
Source: MDPI journal article supplement (https://www.mdpi.com/2072-4292/10/10/1643)
Supplement: s1 [file s1]

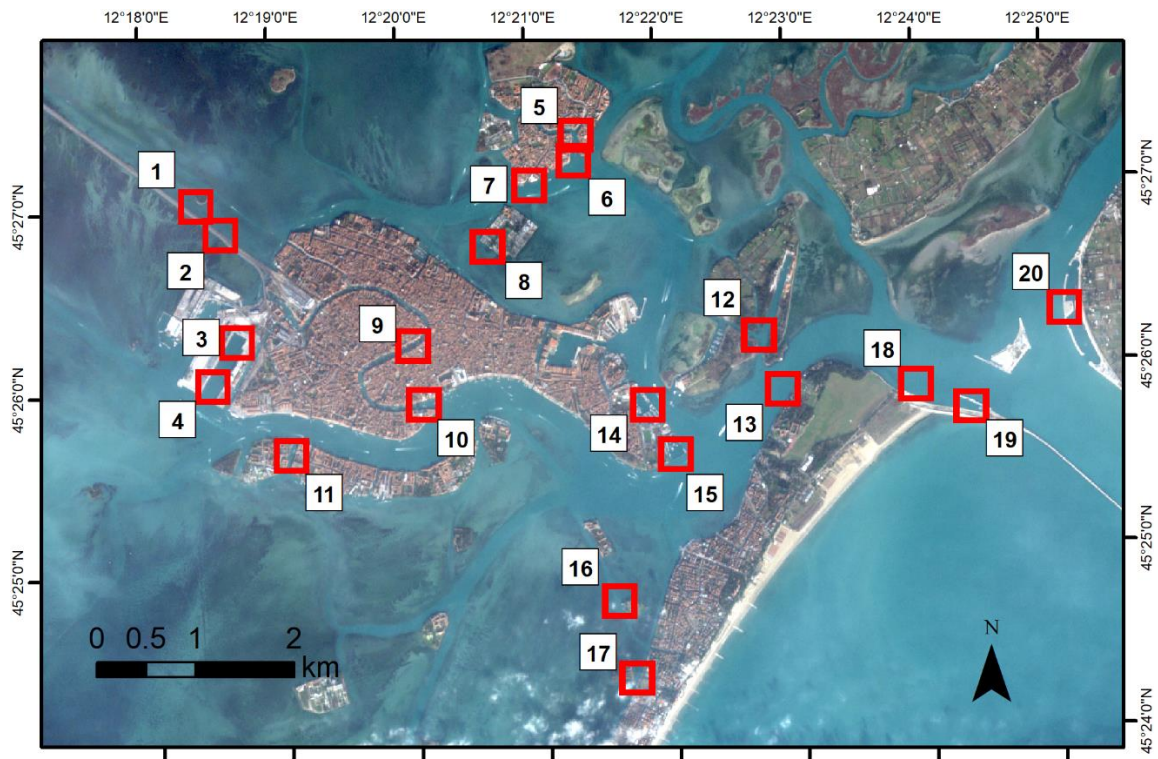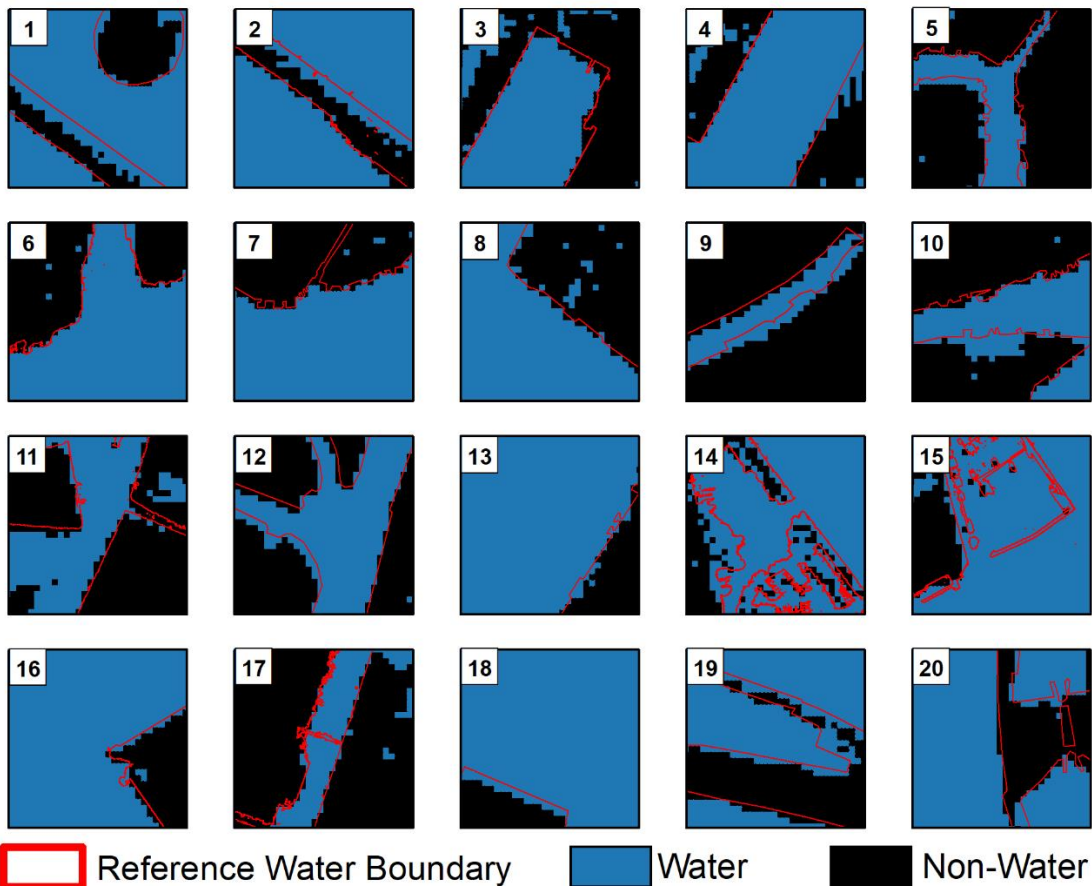

**Figure S1.** Overview of the Sentinel-2 RGB image of Venice (upper) and 20 reference sites with MuWI-C classified results and reference water boundaries (lower).
